# Supplementary material for: A reagent-free phosphate chemiresistive sensor using carbon nanotubes functionalized with crystal violet
Source: Royal Society of Chemistry journal article supplement (doi:10.1039/d3an00622k), 2023-01-01
Supplement: d3an00622k1.pdf [file d3an00622k1.pdf]

## Supporting information

### **Reagent-free phosphate chemiresistive sensor using carbon nanotube functionalized with crystal violet**

Vinay Patel<sup>1</sup>, Md Ali Akbar<sup>2</sup>, Peter Kruse<sup>2</sup>, and P. Ravi Selvaganapathy<sup>1,3\*</sup>

<sup>1</sup> School of Biomedical Engineering, McMaster University, Hamilton, ON, L8S 4K1, Canada

<sup>2</sup> Department of Chemistry and Chemical Biology, McMaster University, Hamilton, ON, L8S 4M1, Canada

<sup>3</sup> Department of Mechanical Engineering, McMaster University, Hamilton, ON, L8S 4K1, Canada

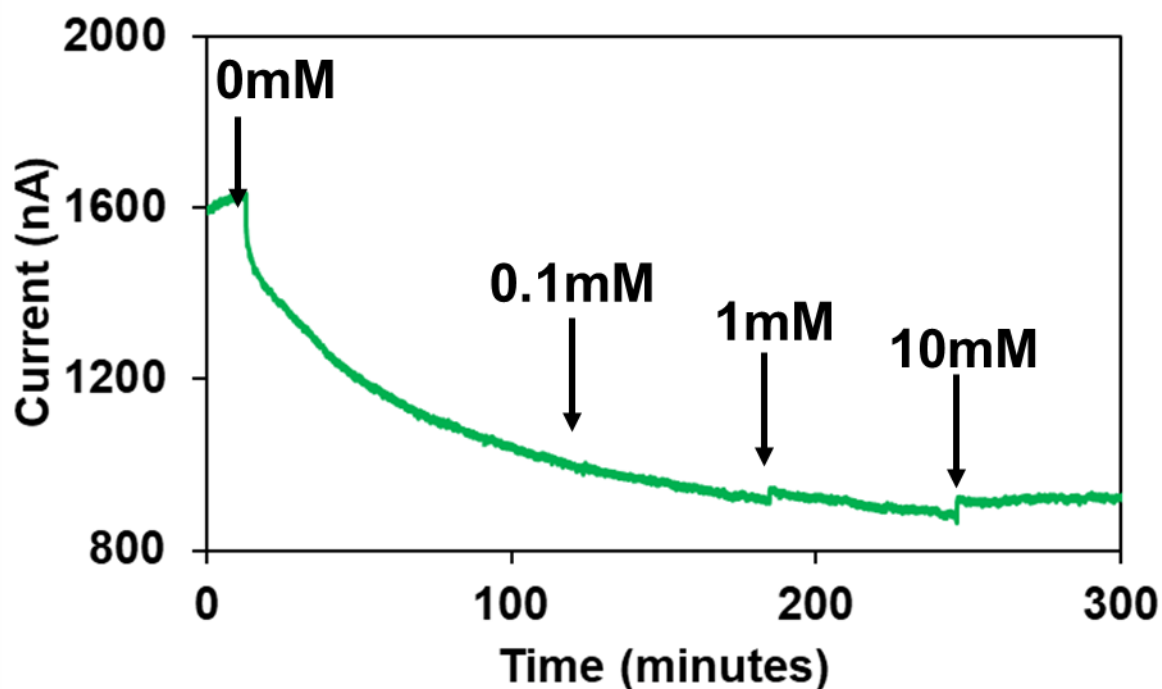

**Figure S1** Sensor response for pristine SWCNT for three  $\text{KH}_2\text{PO}_4$  concentration including 0.1 mM, 1 mM and 10 mM.

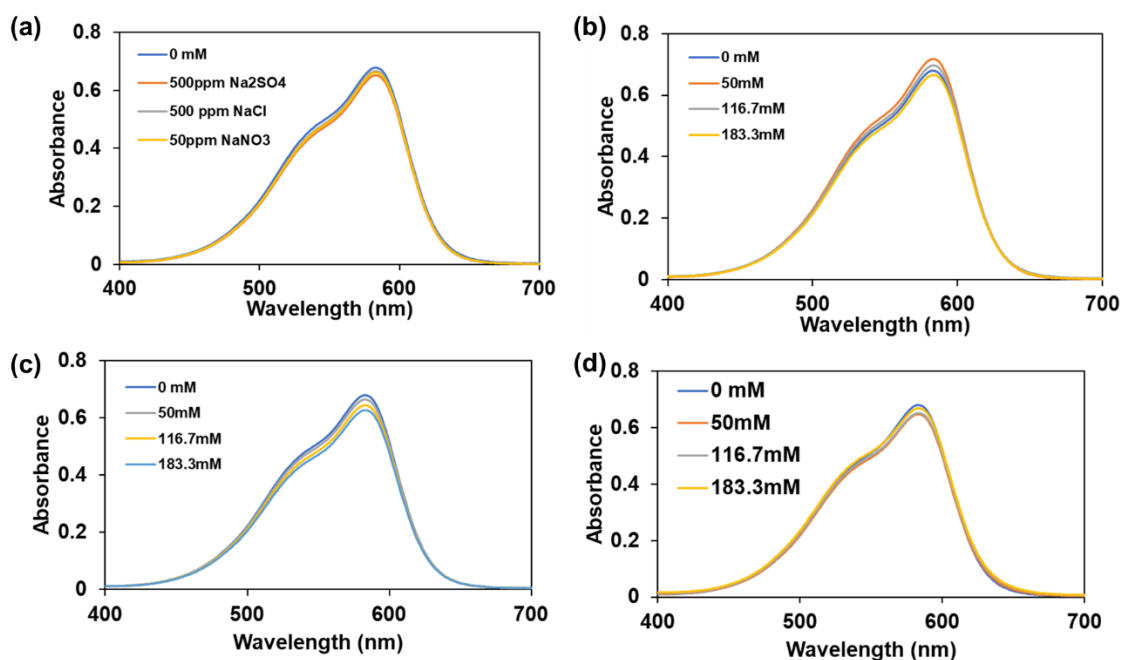

**Figure S2** UV-Vis spectrum (a) Crystal violet solution (18  $\mu\text{M}$ ) exposed 500 ppm of NaCl, 50 ppm of  $\text{NaNO}_3$  and 500 ppm of  $\text{Na}_2\text{SO}_4$ , respectively, (b) Crystal violet solution (18  $\mu\text{M}$ ) in presence of three  $\text{Na}_2\text{SO}_4$  concentrations (50 mM, 116.7 mM and 183.3 mM), (c) Crystal violet solution (18  $\mu\text{M}$ ) in presence of three NaCl concentrations (50 mM, 116.7 mM and 183.3 mM), and (d) Crystal violet solution (18  $\mu\text{M}$ ) in presence of three  $\text{NaNO}_3$  concentrations (50 mM, 116.7 mM and 183.3 mM).

**Table S1** Summary of t-test performed for sensor response at pH 6 and pH 10.

| pH    | Phosphate conc. (mM) | Mean  | Variance | p-value | t-critical (2 tail) | t-stat |
|-------|----------------------|-------|----------|---------|---------------------|--------|
| pH 6  | 0.1                  | 0.69% | 0.01%    |         |                     |        |
|       | 1                    | 0.67% | 0.01%    | 0.98    | 2.78                | 0.02   |
|       | 10                   | 1.14% | 0.02%    | 0.98    | 2.78                | -0.48  |
| pH 10 | 0.1                  | 1.54% | 0.01%    |         |                     |        |
|       | 1                    | 1.48% | 0.02%    | 0.94    | 3.18                | 0.08   |
|       | 10                   | 3.57% | 0.03%    | 0.17    | 2.78                | -1.67  |

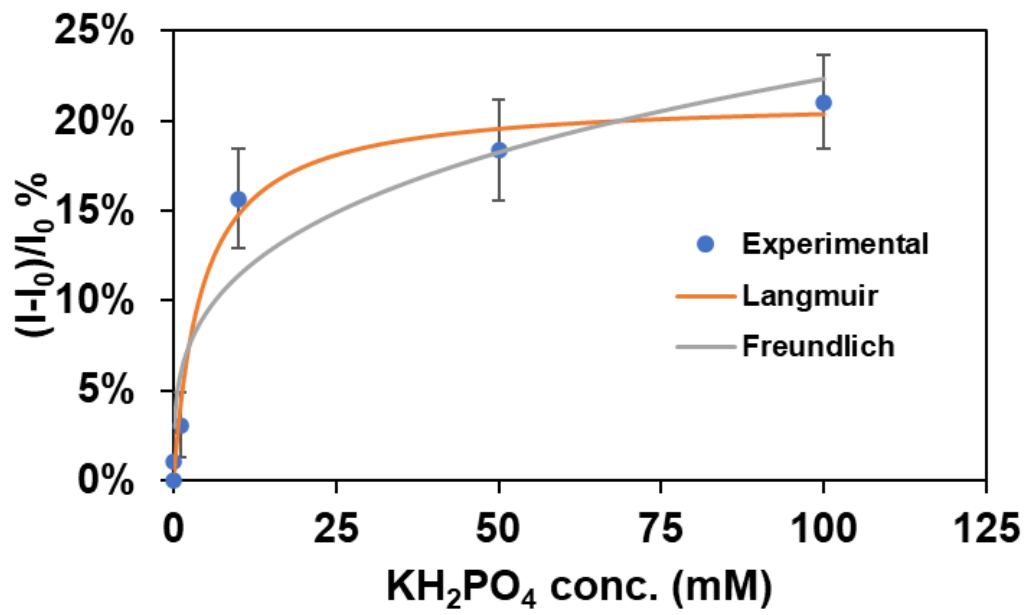

**Figure S3** Sensor response for five different  $\text{KH}_2\text{PO}_4$  concentrations (0.1 mM, 1 mM, 10 mM, 50 mM and 100 mM). The response was fitted to Langmuir and Freundlich adsorption isotherms.

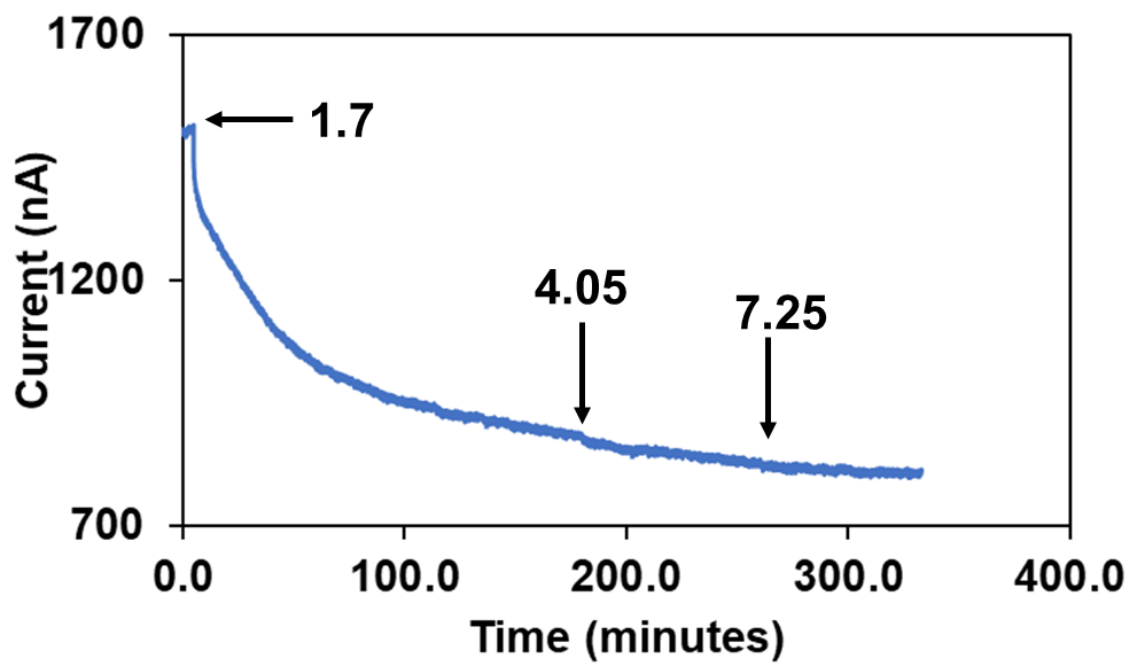

**Figure S4** Sensor response for pristine SWCNT for three conductivity solutions (1.7, 4.05 and 7.25 mS/cm).

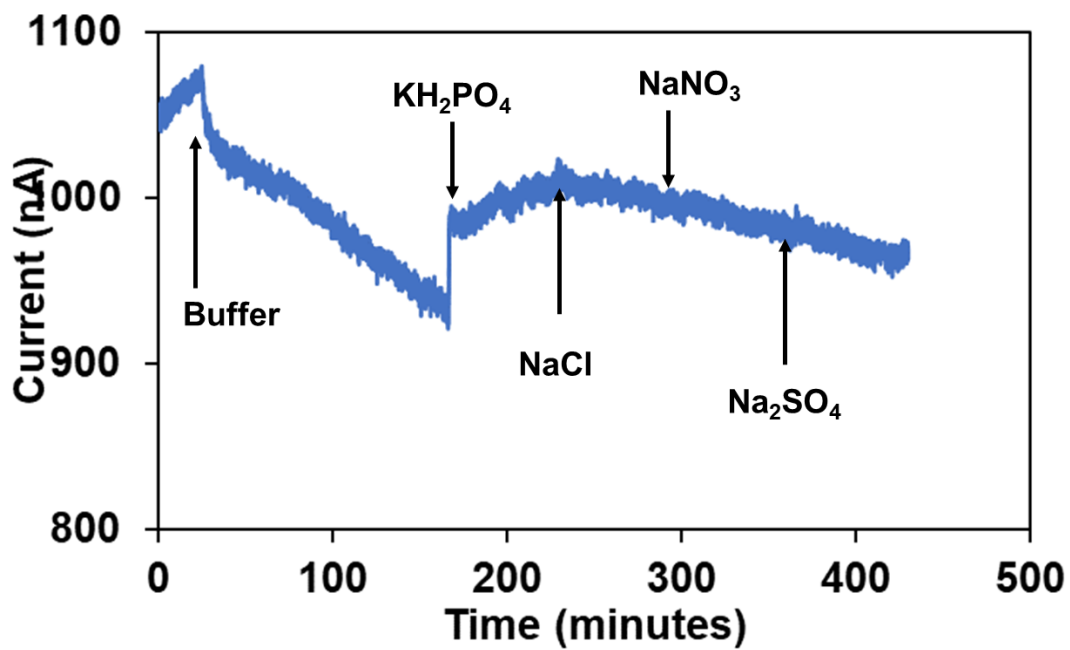

**Figure S5** Sensor response for pristine SWCNT for 10mM H<sub>2</sub>PO<sub>4</sub><sup>-</sup>, 500 ppm of NaCl, 50 ppm of NaNO<sub>3</sub> and 500 ppm of Na<sub>2</sub>SO<sub>4</sub>.

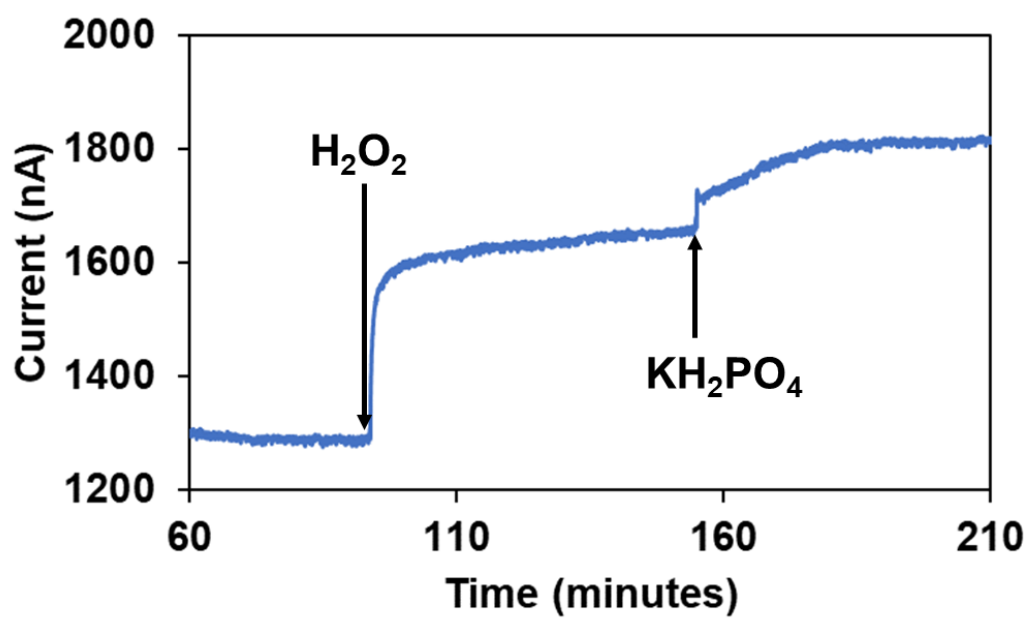

**Figure S6** Sensor exposed to  $\text{H}_2\text{O}_2$  (400 ppm) followed by 10 mM  $\text{KH}_2\text{PO}_4$
